# Supplementary material for: A Residual N-Terminal Peptide Enhances Signaling of Depalmitoylated Hedgehog to the Patched Receptor
Source: MDPI journal article supplement (doi:10.3390/jdb12020011), 2024-04-09
Supplement: s1 [file s1]

**Table S1: Information regarding amplicons and primers**

| abbreviation                    | isoform | FWD primer (5'-3')     | REV primer (3'-5')     | name                                                   |
|---------------------------------|---------|------------------------|------------------------|--------------------------------------------------------|
| <b>Actin <math>\beta</math></b> | 1       | CTATTGGCAACGAGCGGTTTC  | CGGATGTCAACGTCACACTTC  | Actin                                                  |
| <b>Ptch1</b>                    | 2       | GGGCTACGACTATGTCTCTC   | CTTTGATGAACCACTCCAC    | Protein patched homolog 1                              |
| <b>Gli1</b>                     | 1       | CCCTGGTGGCTTTCATCAAC   | TGACTCATCTGAGGTGGGAATC | Zinc finger protein GLI1                               |
| <b>Gli2</b>                     | 1       | CAACTCAGCAGCAGTAGCAG   | CTCCGCTTATGAATGGTGATGG | Zinc finger protein GLI2                               |
| <b>Gli3</b>                     | 1       | GTGGTTCCTATGGGCACTTATC | GTCGGCTTAGGATCTGTTGATG | Zinc finger protein GLI3                               |
| <b>Dlk1</b>                     | 4       | GGCTGTGTCAATGGAGTCTG   | AAGCCCGAACGCTCTATTTTCG | Delta like non-canonical Notch ligand 1 (= Pref1)      |
| <b>Pparg</b>                    | 4       | TCCATTACAAGAGCTGACC    | GGTGGAGATGCAGGTTCTAC   | Peroxisome proliferator-activated receptor $\gamma$    |
| <b>Fabp4</b>                    | 1       | GTGTGATGCCTTTGTGGGAAC  | CATGCCTGCCATTTCCTTG    | Fatty acid-binding protein (= Ap2)                     |
| <b>Cfd</b>                      | 3       | CCTGAACCCTACAAGCGATG   | CAACGAGGCATTCTGGGATAG  | Complement factor D (= adipsin)                        |
| <b>Dgat2</b>                    | 1       | GGCTGATAGCTGTGCTCTAC   | GATGGGAAAGTAGTCTCGGAAG | Diacylglycerin-acyltransferase 2                       |
| <b>Alpl</b>                     | 5       | CTGCAAGGACATCGCATATCAG | CCACATCAGTTCTGTTCTTCGG | Alkaline phosphatase (pan-expressed)                   |
| <b>Spp1</b>                     | 5       | ACAGAAATGCTGTGCCTCTG   | GGTCTCCATCGTCATCATCATC | Secreted phosphoprotein 1 (= Osteopontin)              |
| <b>Bglap</b>                    | 2       | CCAAGCAGGAGGGCAATAAG   | CTCGTCACAAGCAGGTTAAG   | Bone $\gamma$ -carboxy-glutamate protein (Osteocalcin) |
| <b>Runx2</b>                    | 6       | ACACTGCCACCTCTGACTTC   | GGGATGAAATGCTTGGGAAGT  | Runt related transcription factor 2                    |
| <b>Sox9</b>                     | 1       | CGGAACAGACTCACATCTCTCC | GACCTTGAGATTGCCAGAG    | SRY (sex determining region Y)-bos 9                   |
| <b>Col2a1</b>                   | 2       | CTGAAGGTGCTCAAGGTTCTC  | GATCCTTTGGCTCCAGGAATAC | Collagen type II $\alpha$ I                            |
| <b>Col10a1</b>                  | 1       | TCTCCAGCACCAGAATCTATC  | CCATGAACCAGGGTCAAGAAC  | Collagen type X $\alpha$ I                             |
| <b>Col1a1</b>                   | 1       | TGGTCCACAAGGTTTCCAAG   | CATCTCCATTCTTGCCAGGAG  | Collagen type I $\alpha$ I                             |
| <b>Mmp3</b>                     | 1       | ACTTGTCCTGTTTCCATCTC   | GGTTCAGAGAGTTAGACTTGG  | Matrix metalloproteinase 3                             |
| <b>Cdk9</b>                     | 1       | CAGCTCTGTGGCTCCATCAC   | GTCCTTCACCTTCGCTTCTG   | Cyclin-dependent kinase 9 (CDC2-related kinase)        |
| <b>Mki67</b>                    | 1       | TGAGGCTGAGACATGGAGAC   | GGTTCCTTTCCAAGGGACTTTC | Antigen identified by monoclonal antibody Ki67         |
